# Supplementary material for: Retracted article: Aligned nanoporous PtNi nanorod-like structures for electrocatalysis and biosensing
Source: Royal Society of Chemistry journal article supplement (doi:10.1039/c2ra01308h), 2012-01-01
Supplement: c2ra01308h.pdf [file c2ra01308h.pdf]

## Supporting Information

# Aligned nanoporous PtNi nanorod-like structure for electrocatalysis and sensing

Huajun Qiu<sup>a,c\*</sup>, Liang Li<sup>b</sup>, Qiaolin Lang<sup>b</sup>, and Feixue Zou<sup>a</sup>

<sup>a</sup>*School of Chemistry and Chemical Engineering, Shandong University, Jinan 250100, China*

<sup>b</sup>*Qingdao Institute of Bioenergy and Bioprocess Technology, Chinese Academy of Sciences, Qingdao 266101, China*

<sup>c</sup>*School of Chemical and Biomedical Engineering, Nanyang Technological University, 70 Nanyang Drive, Singapore 637457*

\*Email: [qiuhuajun@gmail.com](mailto:qiuhuajun@gmail.com)

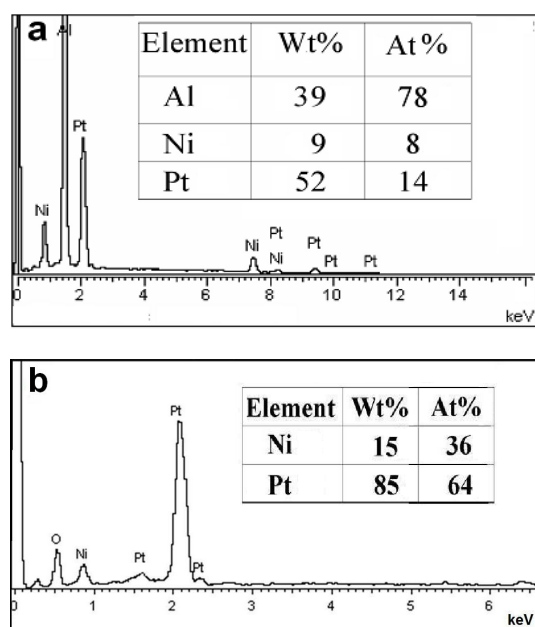

Fig. S-1 EDS spectra of the precursor PtNiAl ternary alloy (a) and the resulted PtNi alloy by dealloying (b).

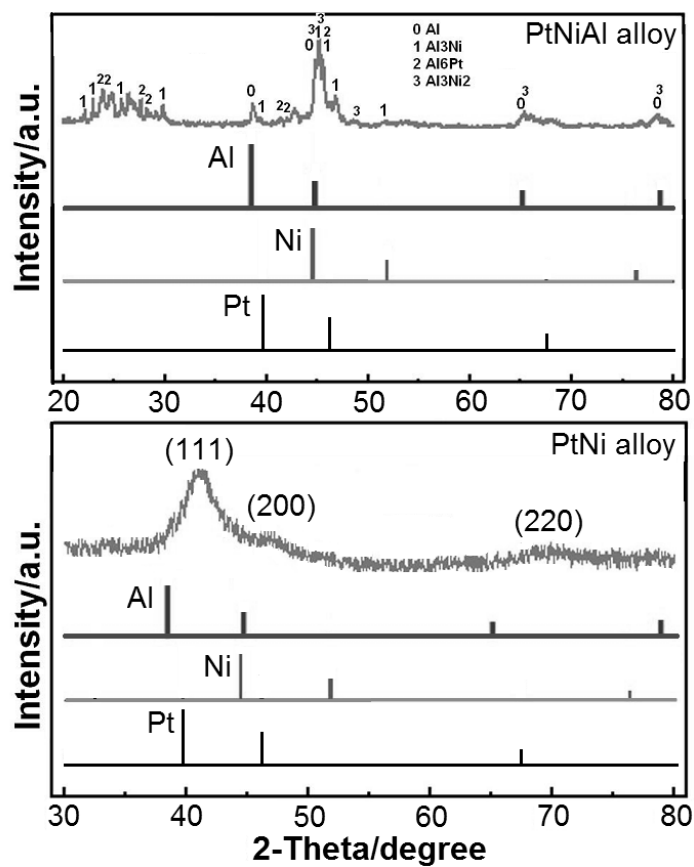

Fig. S-2 XRD patterns of the precursor PtNiAl alloy and the resulted PtNi alloy, the standard patterns of pure Pt, Ni and Al are attached for comparison.

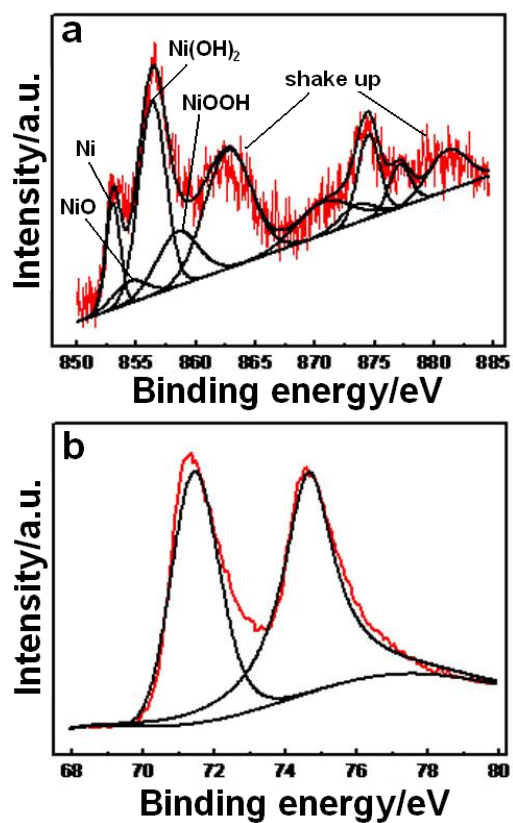

Fig. S-3 XPS spectra of Ni 2p (a) and Pt 4f (b) of nanoporous PtNi alloy.

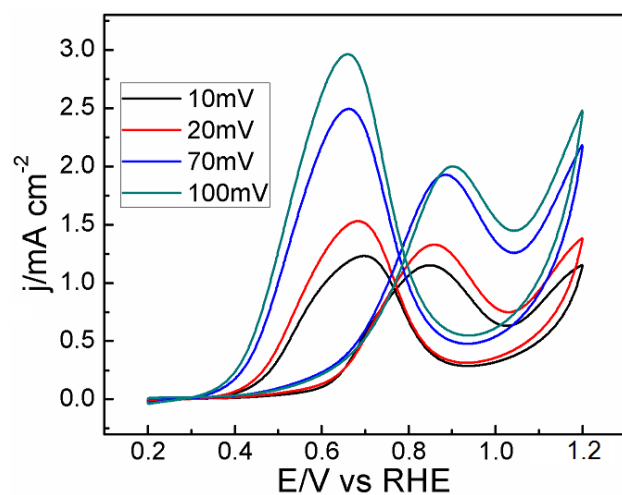

Fig. S-4 CVs of np-PtNi electrode in 0.5 M H<sub>2</sub>SO<sub>4</sub> + 1.0 M C<sub>2</sub>H<sub>5</sub>OH solution at different scan rates.

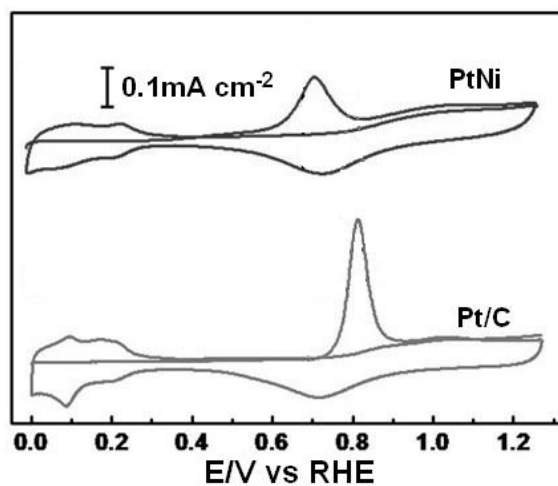

Fig. S-5 Electrochemical CO-stripping curves for nanoporous PtNi and Pt/C catalysts in 0.5 M  $\text{H}_2\text{SO}_4$ . Scan rate:  $50 \text{ mV s}^{-1}$ .

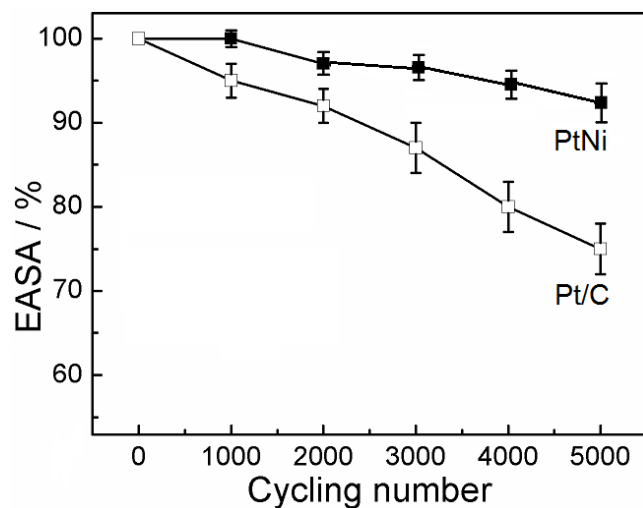

Fig. S-6 EASAs of nanoporous PtNi and Pt/C after treated with different CV scan cycles from 0.6 to 0.9 V in 0.5 M  $\text{H}_2\text{SO}_4$  solution.

Table S-1. Determination of real samples by the present nanoporous PtNi-based biosensor

| Real sample <sup>a</sup> | Nominal concentration (mM) | This biosensor (mM) (RSD) <sup>b</sup> |
|--------------------------|----------------------------|----------------------------------------|
| Ethanol 1                | 2.5                        | 2.6 (4.0%)                             |
| 2                        | 5.0                        | 5.0 (3.7%)                             |
| Glucose 1                | 2.5                        | 2.7 (4.2%)                             |
| 2                        | 5.0                        | 5.1 (3.5%)                             |

<sup>a</sup>The real samples are diluted Chinese liquors and glucose injections (both are domestic products).

<sup>b</sup>RSD is calculated from 5 separate experiments.
